# Supplementary material for: Cardiac mortality after radiotherapy, chemotherapy and endocrine therapy for breast cancer: Cohort study of 2 million women from 57 cancer registries in 22 countries
Source: PubMed Central journal article supplement (PMC7496256; doi:10.1002/ijc.32908), 2020-03-04
Supplement: IJC-147-1437-s001.pdf [file IJC-147-1437-s001.pdf]

## **Supplement to: Cardiac Mortality after Radiotherapy, Chemotherapy and Endocrine Therapy for Breast Cancer: Cohort Study of 2 Million Women from 57 Cancer Registries in 22 Countries**

KE Henson, P McGale, SC Darby, DM Parkin, Y Wang, CW Taylor (Study conducted in collaboration with the International Association of Cancer Registries)

### **Contents**

- Table S1.** Registries and other organisations contributing data to the study and individuals who worked on the preparation of the data or who attended the Study Meeting
- Text S1.** Summary of Data Requested from Individual Cancer Registries
- Table S2.** Tenth Revision International Classification of Diseases (ICD-10) codes used to define the categories of cardiac disease used in the analysis.
- Table S3.** Data included in analyses.
- Figure S1.** Irradiated versus unirradiated women: Cardiac mortality rate ratios by geographic region and type of surgery.
- Table S4.** Treated versus untreated women: Cardiac mortality rate ratios with and without adjustment for the effect of the other treatments in women aged 60+ years when diagnosed with cancer.
- Table S5.** Numbers of women with left or right-sided breast cancer, numbers and percentages irradiated by patient and tumour factors.
- Figure S2.** Irradiated women with left-sided breast cancer versus irradiated women with right-sided breast cancer: Cardiac mortality rate ratios by patient, tumour and treatment characteristics and geographic region.
- Figure S3.** Irradiated women with left-sided breast cancer versus irradiated women with right-sided breast cancer: Cardiac mortality rate ratios, by country.
- Figure S4.** Irradiated women with left-sided breast cancer versus irradiated women with right-sided breast cancer: Cardiac mortality rate ratios, by diagnosis period and country.
- Figure S5.** Figure S5. Irradiated women with left-sided breast cancer versus irradiated women with right-sided breast cancer: Cardiac mortality rate ratios in women who were diagnosed with breast cancer in or after 1990, by age at diagnosis of breast cancer and other factors.
- Figure S6.** Irradiated women with left-sided breast cancer versus irradiated women with right-sided breast cancer: Cardiac mortality rate ratios, by calendar year of breast cancer diagnosis and certified cause of death.
- Figure S7.** Irradiated women with left-sided breast cancer versus irradiated women with right-sided breast cancer: Cardiac mortality rate ratios, by age at diagnosis and whether the women were diagnosed with ischaemic heart disease.
- Table S6.** Breast cancer radiotherapy: Studies reporting cardiac risk according to age irradiated
- Table S7.** Hodgkin lymphoma radiotherapy: Studies reporting cardiac risk according to age irradiated

**Table S1. Registries and other organisations contributing data to the study and individuals who worked on the preparation of the data or who attended the Study Meeting**

| Country                            | Organisation                                                                                                                                                                                                                                                                              | Individuals who worked on the Preparation of the Data or attended the Study Meeting                                                                                                          |
|------------------------------------|-------------------------------------------------------------------------------------------------------------------------------------------------------------------------------------------------------------------------------------------------------------------------------------------|----------------------------------------------------------------------------------------------------------------------------------------------------------------------------------------------|
| <b>Europe: Britain and Ireland</b> |                                                                                                                                                                                                                                                                                           |                                                                                                                                                                                              |
| UK                                 | *Eastern Cancer Registration & Information Centre (Cambridge)<br>*Northern and Yorkshire Cancer Registry and Information Service<br>Scottish Cancer Registry<br>*Thames Cancer Registry<br>*West Midlands Cancer Intelligence Unit<br><br><i>*Currently part of Public Health England</i> | David Greenberg, Clement Brown, Karen Wright<br>David Forman, Phillip Deer, Michael Walkley<br>David Brewster, Catherine Storey<br>Henrik Møller, Karen Linklater<br>Stacey Croft, Rosie Day |
| Ireland                            | Ireland National Cancer Registry                                                                                                                                                                                                                                                          | Harry Comber                                                                                                                                                                                 |
| <b>Europe: Nordic counties</b>     |                                                                                                                                                                                                                                                                                           |                                                                                                                                                                                              |
| Denmark                            | Danish Breast Cancer Cooperative Group<br>Danish Cancer Society - Danish Cancer Registry                                                                                                                                                                                                  | Maj-Britt Jensen; Marianne Ewertz<br>Georg Paludan Müller, Gerda Engholm, Hans cynthia                                                                                                       |
| Finland                            | Finnish Cancer Registry                                                                                                                                                                                                                                                                   | Eero Pukkala                                                                                                                                                                                 |
| Norway                             | Cancer Registry of Norway                                                                                                                                                                                                                                                                 | Steinar Tretli                                                                                                                                                                               |
| Sweden                             | Gothenburg Regional Cancer Registry<br>Regional Tumour Registry, Linköping<br>The Swedish Cancer Registry (Stockholm & Umea)                                                                                                                                                              | Nils Conradi, Ingmarie Johanson<br>Bo Nordenskjöld, Helena Fohlin, Johan Rosell<br>Jan Adolfsson, Nils Olof Bengtsson, Per Hall, Anna Bennet                                                 |
| <b>Europe: Other countries</b>     |                                                                                                                                                                                                                                                                                           |                                                                                                                                                                                              |
| Austria                            | Cancer Registry of Salzburg<br>Cancer Registry of Tyrol<br>Cancer Registry of Vorarlberg                                                                                                                                                                                                  | Richard Greil, Johann Lettner<br>Wilhelm Oberaigner<br>Hans Concin, Hanno Ulmer                                                                                                              |

*Table S1 continued overleaf*

Table S1 continued

| Country     | Organisation                                                                                                                                                                                                                                                                                                                                                   | Individuals who worked on the Preparation of the Data or attended the Study Meeting                                                                                                                                                                                                                                                                                                                                                                                                                             |
|-------------|----------------------------------------------------------------------------------------------------------------------------------------------------------------------------------------------------------------------------------------------------------------------------------------------------------------------------------------------------------------|-----------------------------------------------------------------------------------------------------------------------------------------------------------------------------------------------------------------------------------------------------------------------------------------------------------------------------------------------------------------------------------------------------------------------------------------------------------------------------------------------------------------|
| Estonia     | Estonian Cancer Registry                                                                                                                                                                                                                                                                                                                                       | Margit Mägi, Mare Tekkel, Kaja Rahu                                                                                                                                                                                                                                                                                                                                                                                                                                                                             |
| France      | Institut Gustave Roussy                                                                                                                                                                                                                                                                                                                                        | Carole Rubino                                                                                                                                                                                                                                                                                                                                                                                                                                                                                                   |
| Germany     | Population Based Cancer Registry Bavaria<br>Gemeinsames Krebsregister (Berlin)<br>Bremen Cancer Registry<br>Cancer Registry of Schleswig-Holstein Registerstelle                                                                                                                                                                                               | Gabriele Schubert-Fritschle, Martin Meyer<br>Bettina Eisinger, Roland Stabenow<br>Klaus Giersiepen<br>Alexander Katalinic                                                                                                                                                                                                                                                                                                                                                                                       |
| Italy       | Friuli Venezia Giulia Cancer Registry<br>Latina Cancer Registry<br>Lombardy Cancer Registry<br>Modena Cancer Registry<br>National Tumour Institute (Milan)<br>Parma Province Cancer Registry<br>Piedmont Cancer Registry<br>Ragusa Cancer Registry<br>Sondrio Cancer Registry<br>Tuscany Cancer Registry<br>Umbria Cancer Registry<br>Venetian Tumour Registry | Luigino Dal Maso, Lorenzo Simonato, Loris Zanier, Diego Serraino, Margherita de Dottori, Massimo Rugge<br>Fabio Pannozzo, Antonella Fontana<br>Giovanna Tagliabue, Paolo Contiero, Sabrina Fabiano, Paolo Crosignani<br>Massimo Federico, Monica Pirani<br>Russo Antonio<br>Vincenzo De Lisi, Paolo Sgargi<br>Roberto Zanetti, Stefano Rosso<br>Rosario Tumino, Aurora Sigona<br>Roberto Tessandori<br>Lorenzo Livi, Emanuelle Crocetti<br>Cynthia Aristei, Francesco La Rosa, Fabrizio Stracci<br>Paola Zambon |
| Lithuania   | Lithuanian Cancer Registry                                                                                                                                                                                                                                                                                                                                     | Juozas Kurtinaitis, Simona Letautiene                                                                                                                                                                                                                                                                                                                                                                                                                                                                           |
| Netherlands | Eindhoven Cancer Registry<br>Netherlands Cancer Institute                                                                                                                                                                                                                                                                                                      | Isabelle Soerjomataram<br>Flora van Leeuwen, Berthe Aleman, Willem Klokman                                                                                                                                                                                                                                                                                                                                                                                                                                      |
| Slovakia    | National Cancer Registry of Slovak Republic                                                                                                                                                                                                                                                                                                                    | Martina Ondrusova                                                                                                                                                                                                                                                                                                                                                                                                                                                                                               |

Table S1 continued overleaf

Table S1 continued

| Country              | Organisation                                                                                                            | Individuals who worked on the Preparation of the Data or attended the Study Meeting                                   |
|----------------------|-------------------------------------------------------------------------------------------------------------------------|-----------------------------------------------------------------------------------------------------------------------|
| Slovenia             | Cancer Registry of Slovenia                                                                                             | Maja Primic Zakelj                                                                                                    |
| Spain                | Catalan Institute of Oncology (Barcelona)<br>Epidemiology Unit and Girona Cancer Registry<br>Navarra Cancer Registry    | Josepa Ribes Puig<br>Rafael Marcos-Gragera<br>Maria Eva Ardanaz Aicua                                                 |
| Switzerland          | Geneva Cancer Registry<br>Grisons Cancer Registry<br>Cancer Registry of St. Gall-Appenzell<br>Ticino Cancer Registry    | Christine Bouchardy, Massimo Usel<br>Bertrand Camey, Harald Frick<br>Silvia Ess<br>Andrea Bordoni, Alessandra Spitale |
| <b>North America</b> |                                                                                                                         |                                                                                                                       |
| Canada               | Alberta Cancer Registry<br>British Columbia Cancer Registry<br>Ontario Cancer Registry                                  | Heather Bryant<br>Ivo Olivotto, Caroline Speers<br>Laurence Paszat                                                    |
| USA                  | Connecticut Tumour Registry<br>Puerto Rico Central Cancer Registry<br>Surveillance Epidemiology and End Results Program | Anthony Polednak<br>Mariela Torres Cintron<br>Brenda Edwards                                                          |
| <b>Other regions</b> |                                                                                                                         |                                                                                                                       |
| Australia            | New South Wales Central Cancer Registry                                                                                 | Paul Jelfs, Elizabeth Tracey, Helen Barraclough                                                                       |
| Israel               | Israel National Cancer Registry                                                                                         | Micha Barchana                                                                                                        |
| Japan                | Tumour & Tissue Registry Office (Hiroshima)<br>Kanagawa Cancer Centre<br>Nagasaki Prefectural Cancer Registry           | Nobue Nishi, Ritsu Sakata<br>Naoyuke Okamoto<br>Midori Soda                                                           |

Note: Several other organisations provided preliminary data for the study, but did not have information on all the variables necessary for inclusion in the final analysis.

## **Text S1. Summary of Data Requested from Individual Cancer Registries**

Cancer registries and other appropriate organisations in high income countries worldwide were invited to contribute to the study. Appropriate contacts were identified through the International Association of Cancer Registries and personal knowledge. A Data Sheet was made available to each organisation detailing the eligibility and exclusion criteria and the variables requested (see next page). Each contributing organisation assembled a patient-level data file locally including follow-up information. The file was then depersonalised before being transferred to Oxford, alongside the coding sheet used for any local variables. The data files were then collated and combined by the analysis team in Oxford.

### *Eligibility criteria:*

1. Women diagnosed with carcinoma in situ in the breast, who received radiotherapy.
2. Women diagnosed with invasive breast cancer (regardless of whether they received radiotherapy) and who were not already in 1.

The term "index breast cancer" denoted the first event (either carcinoma in situ or invasive cancer) after the start of the registry that qualified the woman for entry to the study.

### *Exclusion criteria:*

- Male sex
- Bilateral breast cancer or carcinoma in situ
- Previous invasive cancer (apart from non-melanoma skin cancer) on or before the date of diagnosis of the index breast cancer. A previous diagnosis of cancer in situ of a site other than the breast (e.g. carcinoma in situ of cervix uteri) was allowed
- Emigration at any time prior to date of diagnosis of the index breast cancer (even if subsequently re-immigrated)
- Immigration at any time (before or after date of index breast cancer diagnosis)
- Death on recorded date of diagnosis of the index breast cancer, or cancer diagnosed at autopsy
- Previous treatment with thoracic radiotherapy

**Text S1 (continued)**

| Variable                                                                                              | Values recorded                                                           |
|-------------------------------------------------------------------------------------------------------|---------------------------------------------------------------------------|
| <b>Essential variables</b>                                                                            |                                                                           |
| ID number                                                                                             | (depersonalised)                                                          |
| Date of birth (or age at diagnosis of index breast cancer)                                            | DD/MM/YYYY                                                                |
| Date of diagnosis of index breast cancer                                                              | DD/MM/YYYY                                                                |
| Laterality of index breast cancer                                                                     | Left / Right / Unknown / Bilateral*                                       |
| Behaviour of index breast cancer                                                                      | Malignant / In situ                                                       |
| Radiotherapy for index breast cancer†                                                                 | Yes / No / Unknown                                                        |
| Date of death or emigration or last known to be alive, or date lost to follow-up                      | DD/MM/YYYY or Unknown                                                     |
| Status on date above                                                                                  | Dead / Emigrated / Alive / Unknown                                        |
| Underlying cause of death                                                                             | Code ‡                                                                    |
| <b>Desirable variables</b>                                                                            |                                                                           |
| Region/hospital                                                                                       | Country specific                                                          |
| Ethnic group                                                                                          | Codes used by cancer registry                                             |
| Topography of breast cancer                                                                           | Code ¶                                                                    |
| Morphology of breast cancer                                                                           | Code ¶                                                                    |
| ER-status                                                                                             | Codes used by cancer registry                                             |
| PR-status                                                                                             | Codes used by cancer registry                                             |
| Stage of breast cancer                                                                                | CIS § / Local ** / Regional ++ / Advanced ‡‡ / Unknown                    |
| Type of surgery to breast                                                                             | Breast Conserving Surgery / Mastectomy / Other / None / Unknown           |
| Type of surgery to the axilla                                                                         | Axillary node clearance / Axillary node sampling / Other / None / Unknown |
| Chemotherapy                                                                                          | Yes / No / Unknown                                                        |
| Endocrine therapy                                                                                     | Yes / No / Unknown                                                        |
| Ovarian ablation or suppression                                                                       | Yes / No / Unknown                                                        |
| Dates of diagnosis of any subsequent invasive cancers (including invasive breast cancer, if recorded) | DD/MM/YYYY                                                                |
| Site of any subsequent invasive cancers                                                               | Code ‡                                                                    |
| Laterality of any subsequent invasive lung or breast cancer                                           | Left / Right / Unknown / Not applicable ¶ ¶ / Bilateral *                 |
| Morphology of any subsequent invasive cancer                                                          | Code ¶                                                                    |
| Basis of diagnosis of any subsequent invasive cancer                                                  | Codes used by cancer registry                                             |
| Contributory causes of death (all known)                                                              | Code(s) ‡                                                                 |

\* Diagnosed in both breasts simultaneously (or within 4 months)

† If possible, distinguishing between women who received radiotherapy and those for whom it was indicated but not necessarily received

‡ Coding schedule requested (for example ICD 7/8/9/10 or registry-specific code)

¶ Coding schedule requested (for example ICD-0 code, edition 1, 2, or 3, or registry-specific code)

§ Carcinoma in situ

\*\* Node-negative

++ Node-positive or locally advanced

‡‡ Distant metastases

¶ ¶ If diagnosed in the trachea

**Table S2. Tenth Revision International Classification of Diseases (ICD-10) codes used to define the categories of cardiac disease used in the analysis.**

| <b>Cause of Death</b>      | <b>ICD-10 codes</b>                                                                      |
|----------------------------|------------------------------------------------------------------------------------------|
| Ischaemic heart disease    | I20-I25                                                                                  |
| Arrhythmia                 | I44-49                                                                                   |
| Heart failure              | I01.2, I09.0, I11.0, I13.0, I13.2, I40-I43, I50, I51.4-5, I51.7                          |
| Non-rheumatic valvular     | I34-I39                                                                                  |
| Rheumatic valvular         | I01.1, I05-I08, I09.1                                                                    |
| Pericarditis               | I01.0, I09.2, I30-I32                                                                    |
| Other cardiac disease      | I01.8-9, I02.0, I09.8-9, I11.9, I13.1, I13.9, I27.1-9, I33, I51.0-3, I51.6, I51.8-9, I52 |
| <b>All cardiac disease</b> | <b>I01, I02.0, I05-I09, I11, I13, I20-I25, I27.1-9, I30-I52</b>                          |

**Table S3. Data included in analyses.**

| Organisation                       |                                                                | Dates of breast cancer diagnosis | Period of follow-up | Number of women | Number given RT | % RT | Cardiac disease deaths |
|------------------------------------|----------------------------------------------------------------|----------------------------------|---------------------|-----------------|-----------------|------|------------------------|
| <b>Europe: Britain and Ireland</b> |                                                                |                                  |                     |                 |                 |      |                        |
| UK                                 | Eastern Cancer Registration & Information Centre (Cambridge)   | 1941 to 2006                     | 1969 to 2007        | 43,544          | 23,266          | 53   | 628                    |
|                                    | Northern and Yorkshire Cancer Registry and Information Service | 1980 to 2004                     | 1991 to 2006        | 51,701          | 29,723          | 57   | 597                    |
|                                    | Scottish Cancer Registry                                       | 1996 to 2004                     | 1997 to 2006        | 22,486          | 13,373          | 59   | 389                    |
|                                    | Thames Cancer Registry                                         | 1960 to 2006                     | 1960 to 2006        | 160,472         | 81,370          | 51   | 2,642                  |
|                                    | West Midlands Cancer Intelligence Unit                         | 1977 to 2004                     | 1977 to 2007        | 65,781          | 39,470          | 60   | 1,929                  |
| Ireland                            | Ireland National Cancer Registry                               | 1994 to 2004                     | 1994 to 2006        | 13,594          | 6,117           | 45   | 114                    |
| <b>Europe: Nordic counties</b>     |                                                                |                                  |                     |                 |                 |      |                        |
| Denmark                            | Danish Breast Cancer Cooperative Group                         | 1977 to 2005                     | 1978 to 2011        | 57,663          | 28,529          | 49   | 2,046                  |
|                                    | Danish Cancer Registry                                         | 1943 to 1977                     | 1943 to 2001        | 44,217          | 30,923          | 70   | 3,632                  |
| Finland                            | Finnish Cancer Registry                                        | 1953 to 2006                     | 1969 to 2006        | 76,194          | 45,850          | 60   | 5,310                  |
| Norway                             | Cancer Registry of Norway                                      | 1986 to 2004                     | 1986 to 2006        | 20,310          | 9,644           | 47   | 187                    |
| Sweden                             | Gothenburg Regional Cancer Registry                            | 1989 to 2006                     | 1989 to 2007        | 12,651          | 6,925           | 55   | 279                    |
|                                    | Regional Tumour Registry, Linköping                            | 1986 to 2003                     | 1986 to 2004        | 7,077           | 5,209           | 74   | 212                    |
|                                    | The Swedish Cancer Registry (Stockholm & Umea)                 | 1976 to 2006                     | 1976 to 2006        | 28,332          | 16,414          | 58   | 1,262                  |

*Table S3 continued overleaf*



Table S3 continued

|                                | Organisation                                         | Dates of breast cancer diagnosis | Period of follow-up | Number of women | Number given RT | % RT | Cardiac disease deaths |
|--------------------------------|------------------------------------------------------|----------------------------------|---------------------|-----------------|-----------------|------|------------------------|
| <b>Europe: Other countries</b> |                                                      |                                  |                     |                 |                 |      |                        |
| Austria                        | Cancer Registry of Salzburg                          | 1962 to 2007                     | 1979 to 2007        | 6,011           | 3,556           | 59   | 91                     |
|                                | Cancer Registry of Tyrol                             | 1988 to 2003                     | 1988 to 2005        | 4,138           | 1,812           | 44   | 114                    |
|                                | Cancer Registry of Vorarlberg                        | 1985 to 2003                     | 1985 to 2007        | 1,459           | 1,320           | 90   | 18                     |
| Estonia                        | Estonian Cancer Registry                             | 1968 to 2000                     | 1968 to 2005        | 11,043          | 4,959           | 45   | 722                    |
| France                         | Institut Gustave Roussy                              | 1954 to 1984                     | 1954 to 2005        | 6,017           | 4,472           | 74   | 192                    |
| Germany                        | Population Based Cancer Registry Bavaria             | 1998 to 2007                     | 1998 to 2007        | 30,954          | 23,545          | 76   | 55                     |
|                                | Gemeinsames Krebsregister (Berlin)                   | 1961 to 2005                     | 1961 to 2007        | 194,532         | 101,509         | 52   | 2,170                  |
|                                | Bremen Cancer Registry                               | 1988 to 2005                     | 1999 to 2007        | 1,935           | 1,884           | 97   | 5                      |
|                                | Cancer Registry of Schleswig-Holstein Registerstelle | 1997 to 2004                     | 1999 to 2007        | 9,425           | 7,508           | 80   | 53                     |
| Italy                          | Friuli Venezia Giulia Cancer Registry                | 1995 to 2003                     | 1995 to 2005        | 516             | 516             | 100* | 2                      |
|                                | Latina Cancer Registry                               | 2002 to 2007                     | 2004 to 2007        | 489             | 487             | 100* | 0                      |
|                                | Lombardy Cancer Registry                             | 1980 to 2000                     | 1980 to 2005        | 3,015           | 533             | 18   | 38                     |
|                                | Modena Cancer Registry                               | 1988 to 2005                     | 1989 to 2007        | 5,074           | 2,494           | 49   | 48                     |
|                                | National Tumour Institute (Milan)                    | 1999 to 2002                     | 1999 to 2006        | 4,306           | 2,924           | 68   | 44                     |
|                                | Parma Province Cancer Registry                       | 1994 to 2004                     | 1994 to 2006        | 1,993           | 1,767           | 89   | 19                     |
|                                | Piedmont Cancer Registry                             | 2000 to 2003                     | 2000 to 2007        | 2,701           | 1,828           | 68   | 6                      |
|                                | Ragusa Cancer Registry                               | 1990 to 2003                     | 1990 to 2006        | 830             | 542             | 65   | 15                     |
|                                | Sondrio Cancer Registry                              | 1997 to 2006                     | 1998 to 2007        | 994             | 565             | 57   | 7                      |
|                                | Tuscany Cancer Registry                              | 1985 to 2004                     | 1985 to 2005        | 13,758          | 5,761           | 42   | 291                    |
|                                | Umbria Cancer Registry                               | 1968 to 2004                     | 1994 to 2006        | 3,721           | 2,040           | 55   | 52                     |
|                                | Venetian Tumour Registry                             | 1987 to 2001                     | 1987 to 2007        | 2,307           | 1,485           | 64   | 33                     |

Table S3 continued overleaf

Table S3 continued

|                      | Organisation                                      | Dates of breast cancer diagnosis | Period of follow-up | Number of women | Number given RT | % RT | Cardiac disease deaths |
|----------------------|---------------------------------------------------|----------------------------------|---------------------|-----------------|-----------------|------|------------------------|
| Lithuania            | Lithuanian Cancer Registry                        | 1993 to 2005                     | 1993 to 2007        | 10,812          | 4,765           | 44   | 192                    |
| Netherlands          | Eindhoven Cancer Registry                         | 1964 to 2004                     | 1971 to 2004        | 18,319          | 11,840          | 65   | 0                      |
|                      | Netherlands Cancer Institute                      | 1970 to 1987                     | 1971 to 2004        | 7,101           | 6,217           | 88   | 235                    |
| Slovakia             | National Cancer Registry of Slovak Republic       | 1978 to 2003                     | 1978 to 2006        | 28,139          | 18,314          | 65   | 73                     |
| Slovenia             | Cancer Registry of Slovenia                       | 1971 to 2004                     | 1988 to 2007        | 8,863           | 3,754           | 42   | 135                    |
| Spain                | Institute Catalá d'Oncología (Barcelona)          | 1991 to 1997                     | 1991 to 2005        | 850             | 646             | 76   | 15                     |
|                      | Cancer Registry of Girona                         | 1963 to 2005                     | 1978 to 2006        | 1,818           | 1,722           | 95   | 18                     |
|                      | Navarra Cancer Registry                           | 1990 to 2002                     | 1990 to 2007        | 3,187           | 2,332           | 73   | 24                     |
| Switzerland          | Geneva Cancer Registry                            | 1970 to 2004                     | 1975 to 2005        | 802             | 630             | 79   | 15                     |
|                      | Grisons Cancer Registry                           | 1989 to 2005                     | 1989 to 2007        | 1,524           | 591             | 39   | 30                     |
|                      | Cancer Registry of St. Gall-Appenzell             | 1940 to 2005                     | 1980 to 2007        | 2,689           | 1,076           | 40   | 53                     |
|                      | Ticino Cancer Registry                            | 1995 to 2004                     | 1996 to 2007        | 1,961           | 1,178           | 60   | 7                      |
| <b>North America</b> |                                                   |                                  |                     |                 |                 |      |                        |
| Canada               | Alberta Cancer Registry                           | 1989 to 2004                     | 1989 to 2007        | 20,911          | 10,533          | 50   | 411                    |
|                      | British Columbia Cancer Registry                  | 1985 to 2004                     | 1985 to 2007        | 29,723          | 19,115          | 64   | 606                    |
|                      | Ontario Cancer Registry                           | 1982 to 1997                     | 1984 to 2007        | 55,477          | 55,477          | 100* | 1,294                  |
| USA                  | Connecticut Tumour Registry                       | 1935 to 1972                     | 1935 to 2007        | 26,640          | 7,852           | 29   | 3,379                  |
|                      | Puerto Rico Central Cancer Registry               | 1987 to 2003                     | 1987 to 2008        | 13,263          | 6,982           | 53   | 137                    |
|                      | Surveillance Epidemiology and End Results Program | 1973 to 2008                     | 1973 to 2008        | 738,145         | 327,521         | 44   | 24,413                 |

Table S3 continued overleaf

Table S3 continued

|                      | Organisation                                | Dates of breast cancer diagnosis | Period of follow-up | Number of women | Number given RT | % RT | Cardiac disease deaths |
|----------------------|---------------------------------------------|----------------------------------|---------------------|-----------------|-----------------|------|------------------------|
| <b>Other regions</b> |                                             |                                  |                     |                 |                 |      |                        |
| Australia            | New South Wales Central Cancer Registry     | 1972 to 2004                     | 1972 to 2004        | 46,993          | 27,023          | 58   | 845                    |
| Israel               | Israel National Cancer Registry             | 1960 to 2000                     | 1961 to 2006        | 4,827           | 1,503           | 31   | 108                    |
| Japan                | Tumour & Tissue Registry Office (Hiroshima) | 1957 to 2001                     | 1957 to 2007        | 695             | 104             | 15   | 48                     |
|                      | Kanagawa Cancer Centre                      | 1941 to 1989                     | 1971 to 2007        | 1,631           | 372             | 23   | 19                     |
|                      | Nagasaki Prefectural Cancer Registry        | 1956 to 2005                     | 1961 to 2005        | 638             | 638             | 100* | 5                      |

\*Registry provided information only on women who were given radiotherapy.

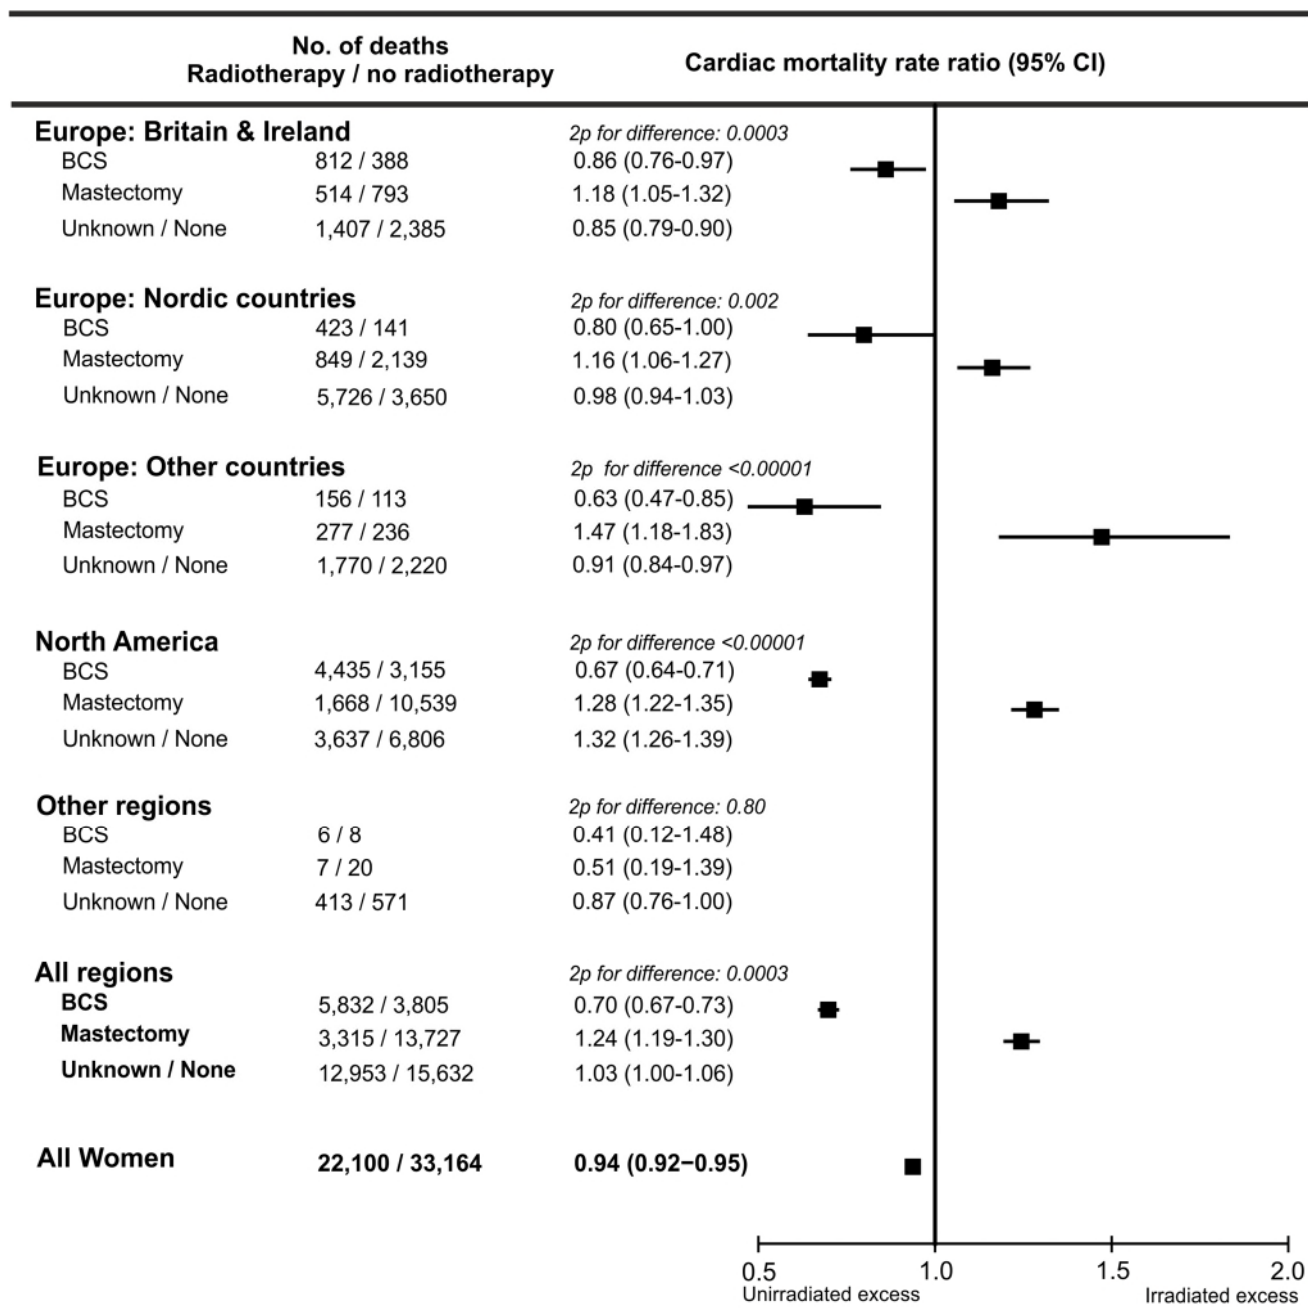

BCS: Breast-conserving surgery  
 2p is for difference between BCS and mastectomy

**Figure S1. Irradiated versus unirradiated women: Cardiac mortality rate ratios by geographic region and type of surgery.**

Rate ratios estimated by Poisson regression with stratification by time since breast cancer diagnosis, age at breast cancer diagnosis, calendar year of breast cancer diagnosis, and country.

**Table S4. Treated versus untreated women: Cardiac mortality rate ratios with and without adjustment for the effect of the other treatments in women aged 60+ years when diagnosed with cancer.**

| Treatment         | Cardiac mortality rate ratio, treatment versus no treatment (95% CI) |                               |
|-------------------|----------------------------------------------------------------------|-------------------------------|
|                   | Unadjusted                                                           | Adjusted for other treatments |
| Radiotherapy      | 0.87 (0.85-0.89)                                                     | 0.88 (0.86-0.90)              |
| Chemotherapy      | 0.86 (0.80-0.92)                                                     | 0.87 (0.81-0.94)              |
| Endocrine therapy | 0.92 (0.88-0.95)                                                     | 0.93 (0.89-0.97)              |

Rate ratios estimated by Poisson regression with stratification by time since breast cancer diagnosis, age at breast cancer diagnosis, calendar year of breast cancer diagnosis, and country.

**Table S5. Numbers of women with left-sided and right-sided breast cancer, numbers of women and percentages irradiated by patient and tumour factors.**

|                                 |                    | All women      |              |                       |              |              |                | Women diagnosed <1990 |              |                       |                 |             |                | Women diagnosed 1990+ |              |                       |              |              |         |
|---------------------------------|--------------------|----------------|--------------|-----------------------|--------------|--------------|----------------|-----------------------|--------------|-----------------------|-----------------|-------------|----------------|-----------------------|--------------|-----------------------|--------------|--------------|---------|
|                                 |                    | Number         |              | Percentage irradiated |              |              |                | Number                |              | Percentage irradiated |                 |             |                | Number                |              | Percentage irradiated |              |              |         |
|                                 |                    | Left           | Right        | Left                  | Right        | Diff*        | p value        | Left                  | Right        | Left                  | Right           | Diff*       | p value        | Left                  | Right        | Left                  | Right        | Diff*        | p value |
| Calendar year of diagnosis      | <1970              | 48,041         | 44,621       | 56.16                 | 55.96        | 0.21         | 0.53           | 48,041                | 44,621       | 56.16                 | 55.96           | 0.21        | 0.53           | -                     | -            | -                     | -            | -            | -       |
|                                 | 1970-1979          | 86,778         | 80,753       | 50.19                 | 50.21        | -0.01        | 0.95           | 86,778                | 80,753       | 50.19                 | 50.21           | -0.01       | 0.95           | -                     | -            | -                     | -            | -            | -       |
|                                 | 1980-1989          | 176,543        | 164,497      | 46.71                 | 46.77        | -0.06        | 0.72           | 176,543               | 164,497      | 46.71                 | 46.77           | -0.06       | 0.72           | -                     | -            | -                     | -            | -            | -       |
|                                 | 1990-1999          | 317,616        | 298,183      | 52.96                 | 53.08        | -0.11        | 0.37           | -                     | -            | -                     | -               | -           | -              | 317,616               | 298,183      | 52.96                 | 53.08        | -0.11        | 0.37    |
|                                 | 2000+              | 367,307        | 349,909      | 55.09                 | 55.50        | -0.42        | <0.001         | -                     | -            | -                     | -               | -           | -              | 367,307               | 349,909      | 55.09                 | 55.50        | -0.42        | <0.001  |
| Age at cancer diagnosis (years) | <40                | 67,579         | 66,078       | 55.14                 | 55.35        | -0.21        | 0.44           | 24,108                | 23,421       | 53.38                 | 53.64           | -0.26       | 0.56           | 43,471                | 42,657       | 56.12                 | 56.30        | -0.17        | 0.61    |
|                                 | 40-49              | 204,149        | 195,363      | 55.59                 | 55.50        | 0.09         | 0.57           | 62,804                | 59,169       | 53.38                 | 52.86           | 0.52        | 0.07           | 141,345               | 136,194      | 56.57                 | 56.64        | -0.07        | 0.70    |
|                                 | 50-59              | 267,959        | 252,010      | 56.03                 | 56.25        | -0.22        | 0.11           | 77,296                | 71,682       | 52.62                 | 52.72           | -0.10       | 0.71           | 190,663               | 180,328      | 57.41                 | 57.65        | -0.24        | 0.14    |
|                                 | 60-69              | 261,607        | 244,036      | 53.09                 | 53.32        | -0.22        | 0.12           | 85,023                | 78,650       | 49.06                 | 48.89           | 0.17        | 0.48           | 176,584               | 165,386      | 55.04                 | 55.42        | -0.38        | 0.02    |
|                                 | 70-79              | 194,991        | 180,476      | 42.97                 | 43.26        | -0.29        | 0.07           | 62,131                | 56,949       | 38.98                 | 39.28           | -0.30       | 0.29           | 132,860               | 123,527      | 44.83                 | 45.10        | -0.27        | 0.18    |
| Race/ethnicity                  | White              | 469,630        | 446,365      | 47.63                 | 47.90        | -0.27        | 0.01           | 132,602               | 123,935      | 38.23                 | 37.89           | 0.34        | 0.07           | 337,028               | 322,430      | 51.33                 | 51.75        | -0.42        | <0.001  |
|                                 | Black              | 34,502         | 32,348       | 42.99                 | 42.89        | 0.10         | 0.80           | 6,150                 | 5,653        | 29.15                 | 30.23           | -1.08       | 0.20           | 28,352                | 26,695       | 45.99                 | 45.57        | 0.42         | 0.32    |
|                                 | Asian/pacific      | 29,906         | 28,628       | 45.27                 | 45.91        | -0.64        | 0.12           | 3,659                 | 3,514        | 25.61                 | 26.27           | -0.66       | 0.52           | 26,247                | 25,114       | 48.01                 | 48.65        | -0.64        | 0.14    |
|                                 | Other/unknown      | 141,446        | 131,814      | 52.12                 | 52.29        | -0.17        | 0.38           | 57,666                | 53,451       | 52.06                 | 52.13           | -0.06       | 0.83           | 83,780                | 78,363       | 52.16                 | 52.39        | -0.24        | 0.34    |
|                                 | Not recorded       | 320,801        | 298,808      | 61.66                 | 61.98        | -0.32        | 0.01           | 111,285               | 103,318      | 62.50                 | 62.91           | -0.41       | 0.05           | 209,516               | 195,490      | 61.21                 | 61.48        | -0.27        | 0.08    |
| Stage at cancer diagnosis       | DCIS               | 67,950         | 63,824       | 38.12                 | 38.26        | -0.14        | 0.60           | 5,876                 | 5,420        | 13.56                 | 14.70           | -1.14       | 0.08           | 62,074                | 58,404       | 40.45                 | 40.45        | 0.00         | 0.99    |
|                                 | Local              | 378,266        | 360,074      | 50.04                 | 50.41        | -0.37        | 0.002          | 88,521                | 83,116       | 34.03                 | 33.87           | 0.15        | 0.50           | 289,745               | 276,958      | 54.93                 | 55.37        | -0.44        | <0.001  |
|                                 | Regional           | 244,231        | 229,963      | 54.55                 | 54.65        | -0.10        | 0.51           | 67,504                | 63,057       | 50.40                 | 50.12           | 0.28        | 0.32           | 176,727               | 166,906      | 56.14                 | 56.36        | -0.22        | 0.20    |
|                                 | Metastatic/unknown | 201,433        | 186,919      | 50.27                 | 50.39        | -0.13        | 0.43           | 96,655                | 89,279       | 54.15                 | 54.43           | -0.28       | 0.23           | 104,778               | 97,640       | 46.68                 | 46.70        | -0.02        | 0.93    |
|                                 | Not recorded       | 104,405        | 97,183       | 70.77                 | 71.14        | -0.36        | 0.07           | 52,806                | 48,999       | 67.66                 | 67.97           | -0.31       | 0.29           | 51,599                | 48,184       | 73.96                 | 74.36        | -0.40        | 0.15    |
| Surgery                         | BCS                | 262,831        | 252,280      | 72.85                 | 72.95        | -0.11        | 0.38           | 27,879                | 26,435       | 70.95                 | 70.13           | 0.82        | 0.04           | 234,952               | 225,845      | 73.07                 | 73.28        | -0.21        | 0.10    |
|                                 | Mastectomy         | 249,487        | 236,322      | 26.87                 | 27.05        | -0.18        | 0.15           | 79,239                | 74,443       | 32.44                 | 32.46           | -0.02       | 0.92           | 170,248               | 161,879      | 24.28                 | 24.57        | -0.29        | 0.05    |
|                                 | None/unknown       | 399,406        | 370,468      | 51.13                 | 51.28        | -0.15        | 0.19           | 162,605               | 150,201      | 47.18                 | 47.24           | -0.07       | 0.70           | 236,801               | 220,267      | 53.84                 | 54.03        | -0.19        | 0.21    |
|                                 | Not recorded       | 84,561         | 78,893       | 71.97                 | 72.22        | -0.25        | 0.26           | 41,639                | 38,792       | 74.00                 | 74.21           | -0.21       | 0.50           | 42,922                | 40,101       | 70.01                 | 70.30        | -0.29        | 0.35    |
| Radiotherapy                    | Yes                | 523,570        | 494,935      | 100.00                | 100.00       | 0.00         | -              | 153,004               | 142,452      | 100.00                | 100.00          | 0.00        | -              | 370,566               | 352,483      | 100.00                | 100.00       | 0.00         | -       |
|                                 | No                 | 472,715        | 443,028      | 0.00                  | 0.00         | 0.00         | -              | 158,358               | 147,419      | 0.00                  | 0.00            | 0.00        | -              | 314,357               | 295,609      | 0.00                  | 0.00         | 0.00         | -       |
| Chemotherapy                    | Yes                | 115,195        | 107,882      | 63.84                 | 63.87        | -0.02        | 0.91           | 16,717                | 15,800       | 58.41                 | 59.09           | -0.68       | 0.21           | 98,478                | 92,082       | 64.77                 | 64.69        | 0.08         | 0.72    |
|                                 | No                 | 355,681        | 329,821      | 52.72                 | 53.09        | -0.37        | 0.002          | 150,382               | 138,696      | 55.09                 | 55.42           | -0.33       | 0.08           | 205,299               | 191,125      | 50.97                 | 51.40        | -0.42        | 0.01    |
|                                 | Unknown            | 16,193         | 15,260       | 72.16                 | 71.97        | 0.19         | 0.70           | 3,504                 | 3,204        | 63.98                 | 62.64           | 1.34        | 0.25           | 12,689                | 12,056       | 74.42                 | 74.44        | -0.03        | 0.96    |
|                                 | Not recorded       | 509,216        | 485,000      | 49.26                 | 49.47        | -0.21        | 0.03           | 140,759               | 132,171      | 41.31                 | 41.04           | 0.27        | 0.15           | 368,457               | 352,829      | 52.30                 | 52.63        | -0.34        | 0.004   |
| Endocrine therapy               | Yes                | 164,624        | 152,995      | 62.80                 | 63.15        | -0.36        | 0.04           | 31,797                | 29,199       | 60.86                 | 61.26           | -0.40       | 0.31           | 132,827               | 123,796      | 63.26                 | 63.60        | -0.34        | 0.08    |
|                                 | No                 | 289,196        | 268,949      | 50.73                 | 51.07        | -0.35        | 0.01           | 136,210               | 126,040      | 54.05                 | 54.37           | -0.33       | 0.09           | 152,986               | 142,909      | 47.77                 | 48.16        | -0.39        | 0.03    |
|                                 | Unknown            | 8,175          | 7,307        | 69.50                 | 69.39        | 0.12         | 0.87           | 2,147                 | 1,953        | 58.64                 | 56.53           | 2.11        | 0.17           | 6,028                 | 5,354        | 73.37                 | 74.08        | -0.70        | 0.40    |
|                                 | Not recorded       | 534,290        | 508,712      | 50.12                 | 50.30        | -0.18        | 0.07           | 141,208               | 132,679      | 41.62                 | 41.40           | 0.23        | 0.23           | 393,082               | 376,033      | 53.18                 | 53.44        | -0.26        | 0.02    |
| <b>Total</b>                    | <b>996,285</b>     | <b>937,963</b> | <b>52.55</b> | <b>52.77</b>          | <b>-0.21</b> | <b>0.003</b> | <b>311,362</b> | <b>289,871</b>        | <b>49.14</b> | <b>49.14</b>          | <b>&lt;0.01</b> | <b>0.98</b> | <b>684,923</b> | <b>648,092</b>        | <b>54.10</b> | <b>54.39</b>          | <b>-0.28</b> | <b>0.001</b> |         |

\* Difference between percentage irradiated left and right

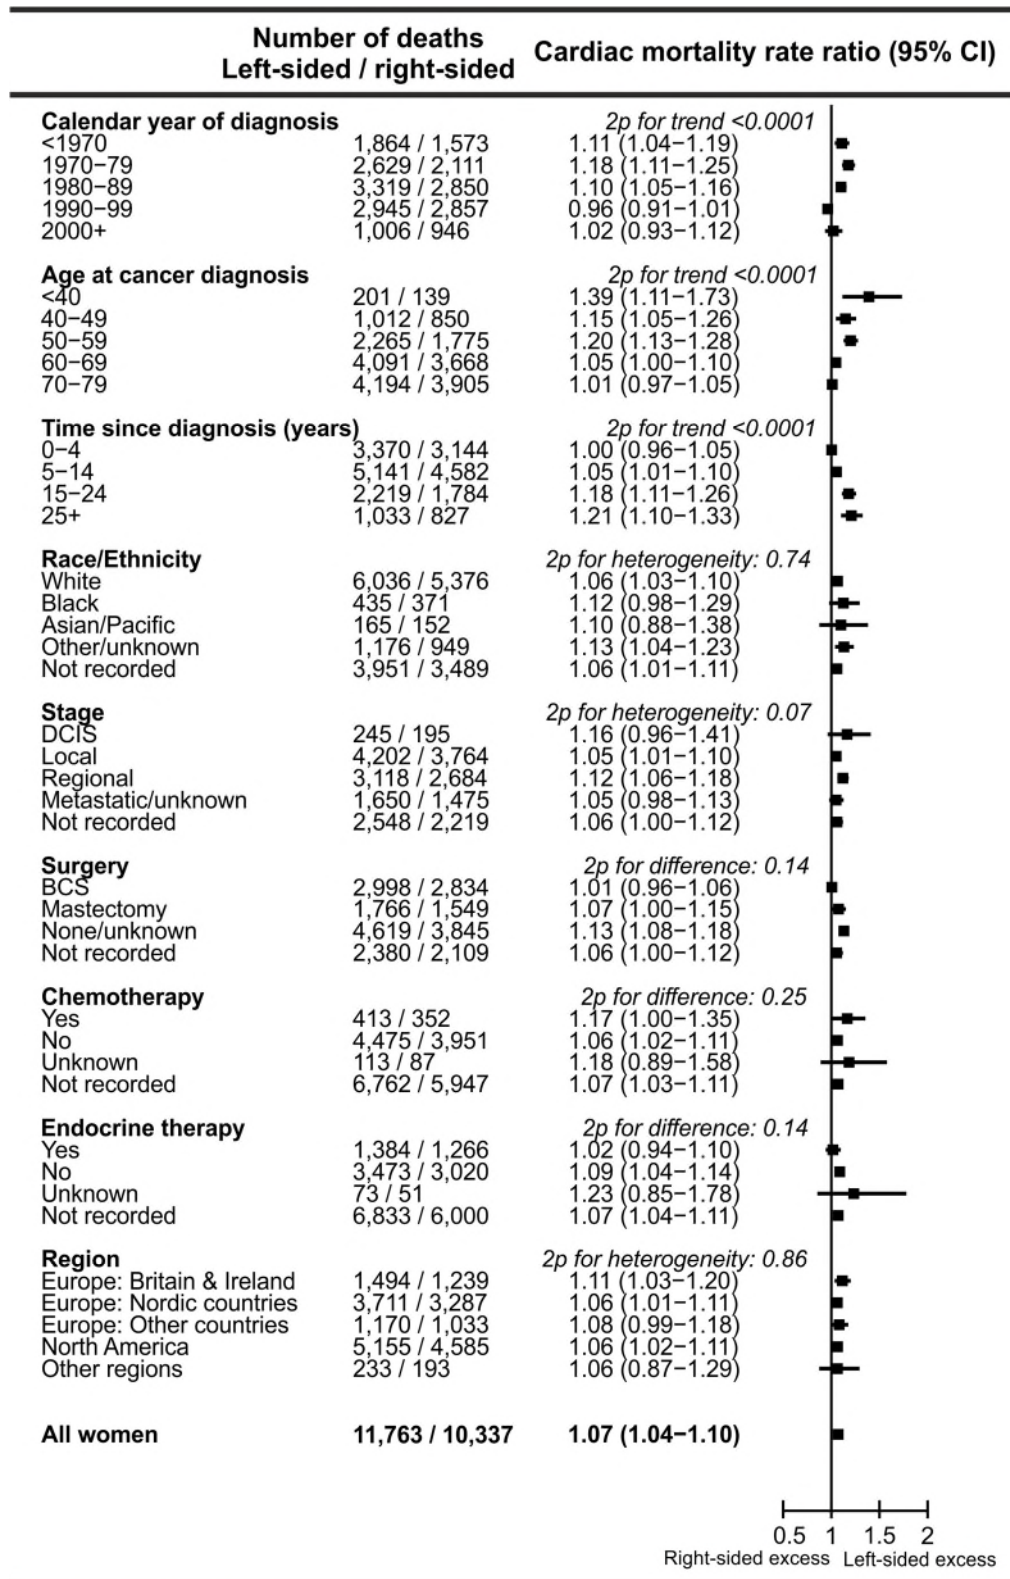

DCIS: Ductal carcinoma in situ.

BCS: Breast-conserving surgery.

*p-values are for tests of trend or heterogeneity between categories with known values (i.e. excluding Other/unknown, Not recorded, Metastatic/unknown, None/unknown)*

**Figure S2. Irradiated women with left-sided breast cancer versus irradiated women with right-sided breast cancer: Cardiac mortality rate ratios by patient, tumour and treatment characteristics, and geographic region.**

Rate ratios estimated by Poisson regression with stratification by time since breast cancer diagnosis, age at breast cancer diagnosis, calendar year of breast cancer diagnosis, and country. See Fig. 3 in the main text for separate analyses of women irradiated <1990 and 1990+. Separate results for individual countries are given in Fig. S3.

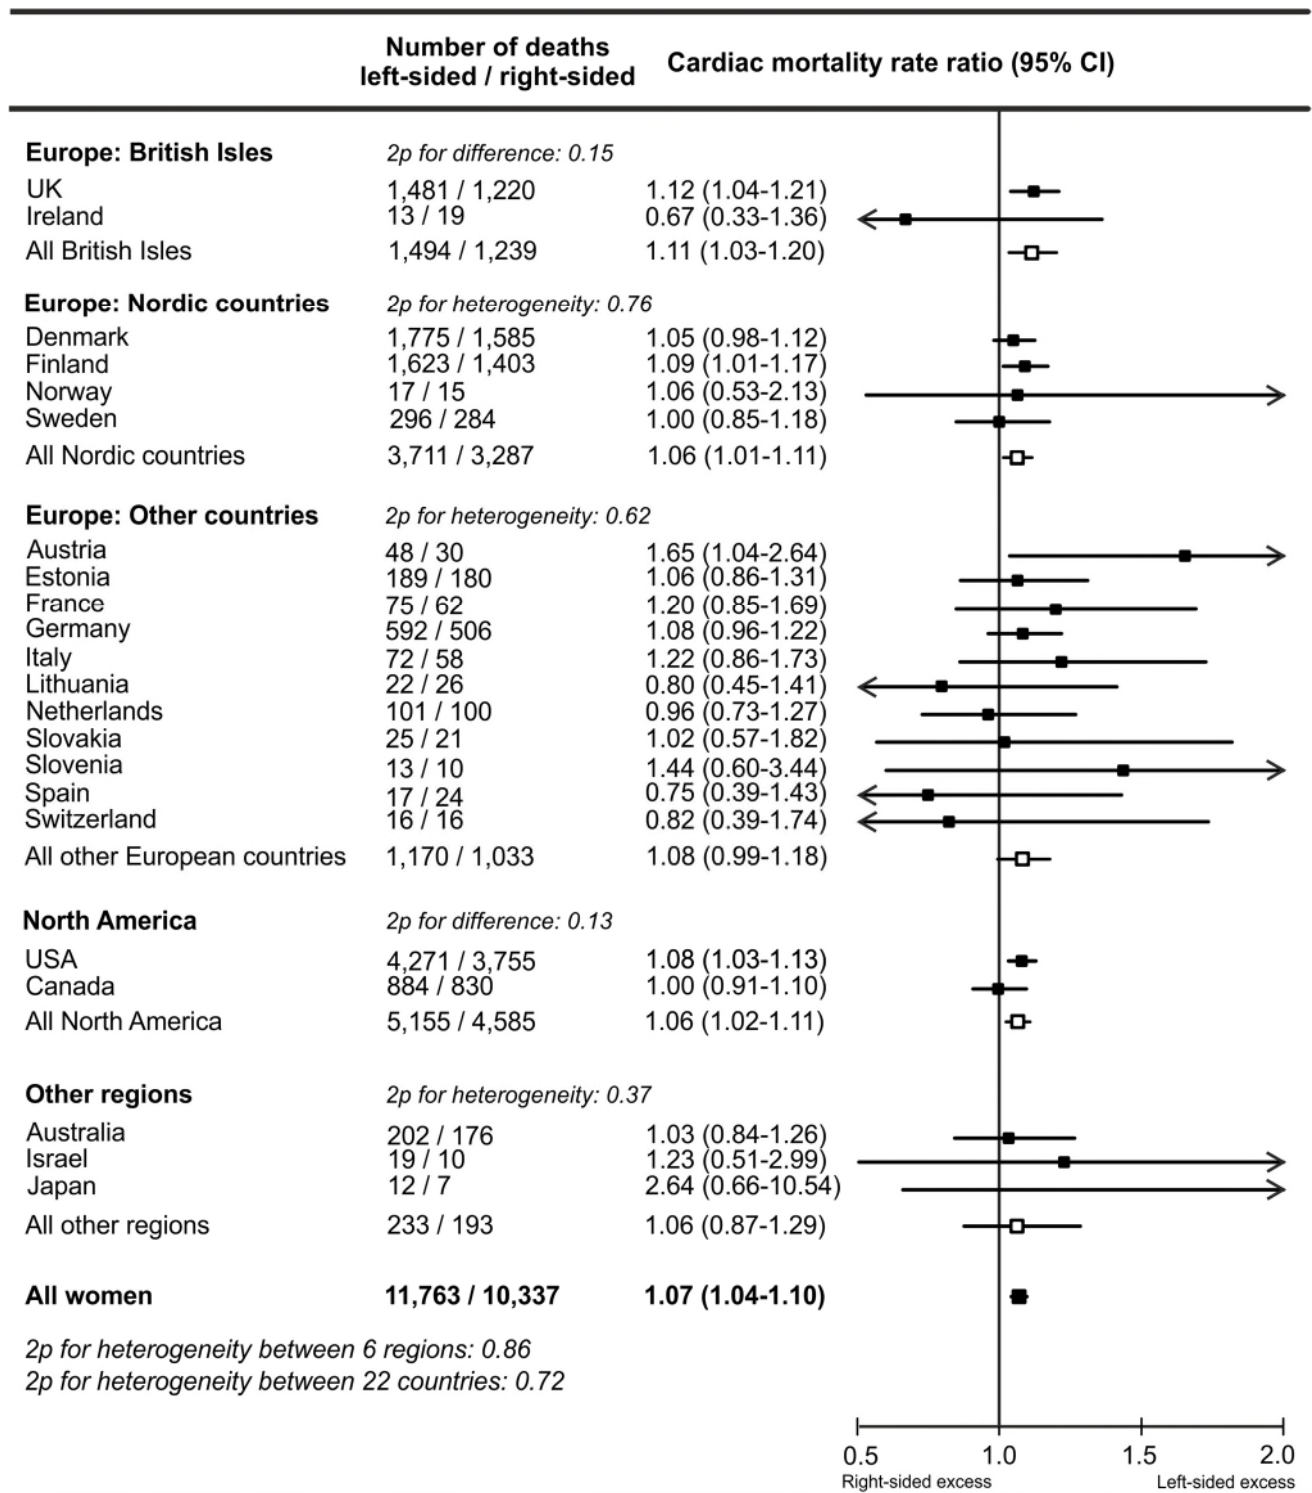

**Figure S3. Irradiated women with left-sided breast cancer versus irradiated women with right-sided breast cancer: Cardiac mortality rate ratios, by country.**

Rate ratios estimated by Poisson regression with stratification by time since breast cancer diagnosis, age at breast cancer diagnosis, calendar year of breast cancer diagnosis, and country. See Figure S4 for separate analyses for women diagnosed before 1990 and diagnosed 1990+



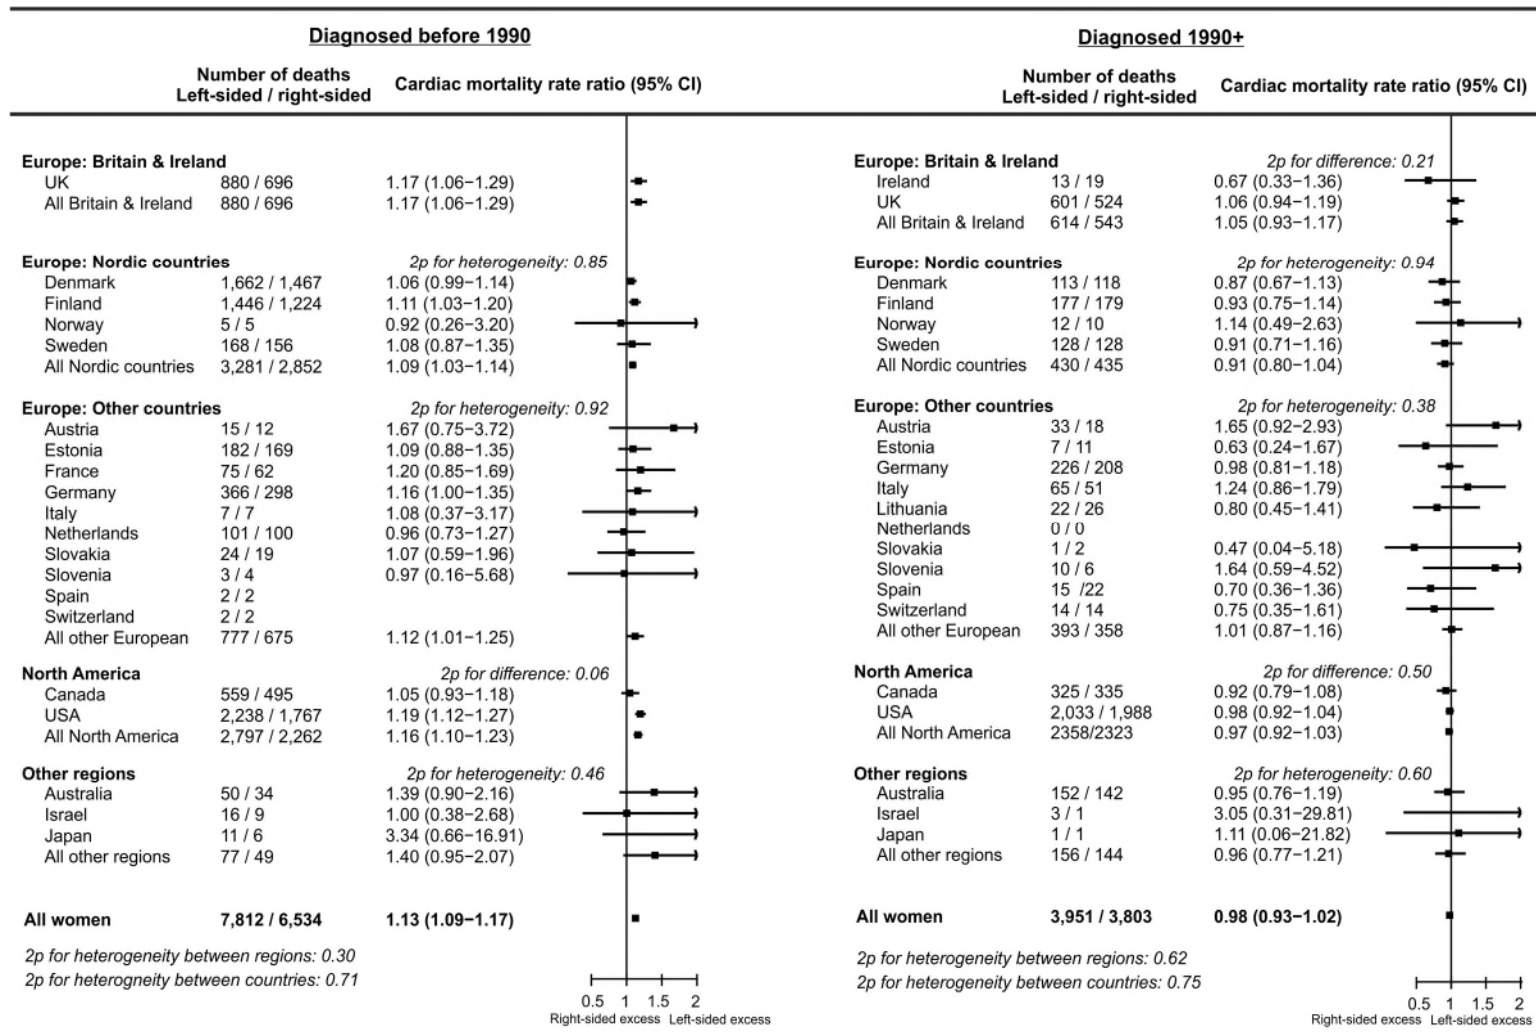

**Figure S4. Irradiated women with left-sided breast cancer versus irradiated women with right-sided breast cancer: Cardiac mortality rate ratios, by diagnosis period and country.**

Rate ratios estimated by Poisson regression with stratification by time since breast cancer diagnosis, age at breast cancer diagnosis, calendar year of breast cancer diagnosis, and country.

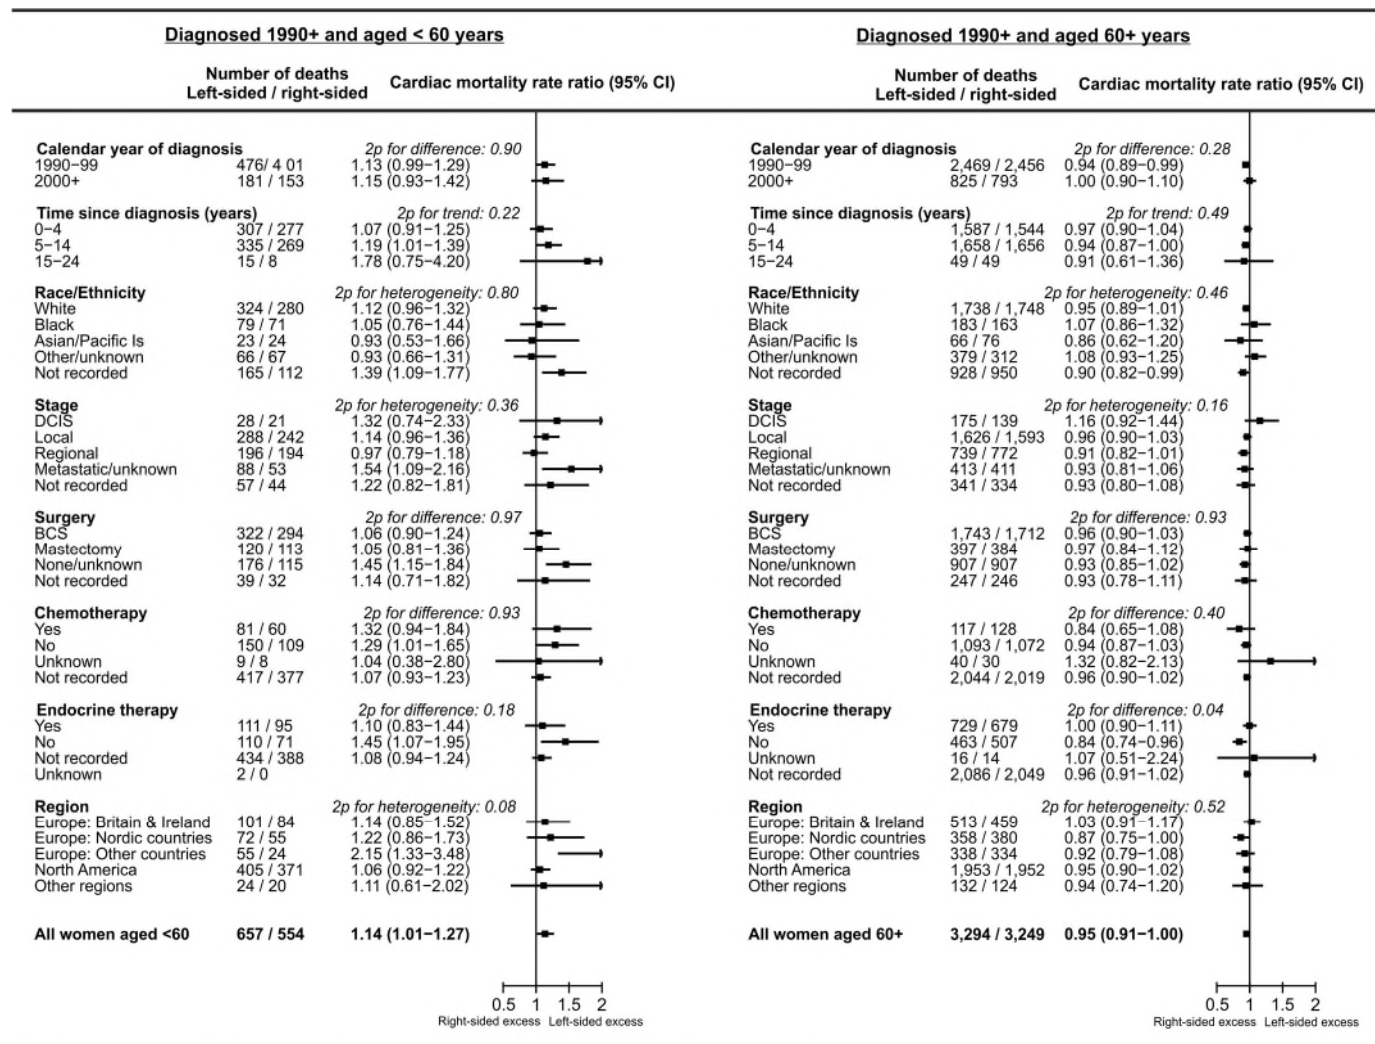

DCIS: Ductal carcinoma in situ.  
 BCS: Breast-conserving surgery.  
 p-values are for tests of trend or heterogeneity between categories with known values (i.e. excluding Other/unknown, Not recorded, Metastatic/unknown, None/unknown)

**Figure S5. Irradiated women with left-sided breast cancer versus irradiated women with right-sided breast cancer: Cardiac mortality rate ratios in women who were diagnosed with breast cancer in or after 1990, by age at diagnosis of breast cancer and other factors. Rate ratios estimated by Poisson regression with stratification by time since breast cancer diagnosis, age at breast cancer diagnosis, calendar year of breast cancer diagnosis, and country. [p value for difference in RR for all women aged <60 vs 60+: 0.005]**

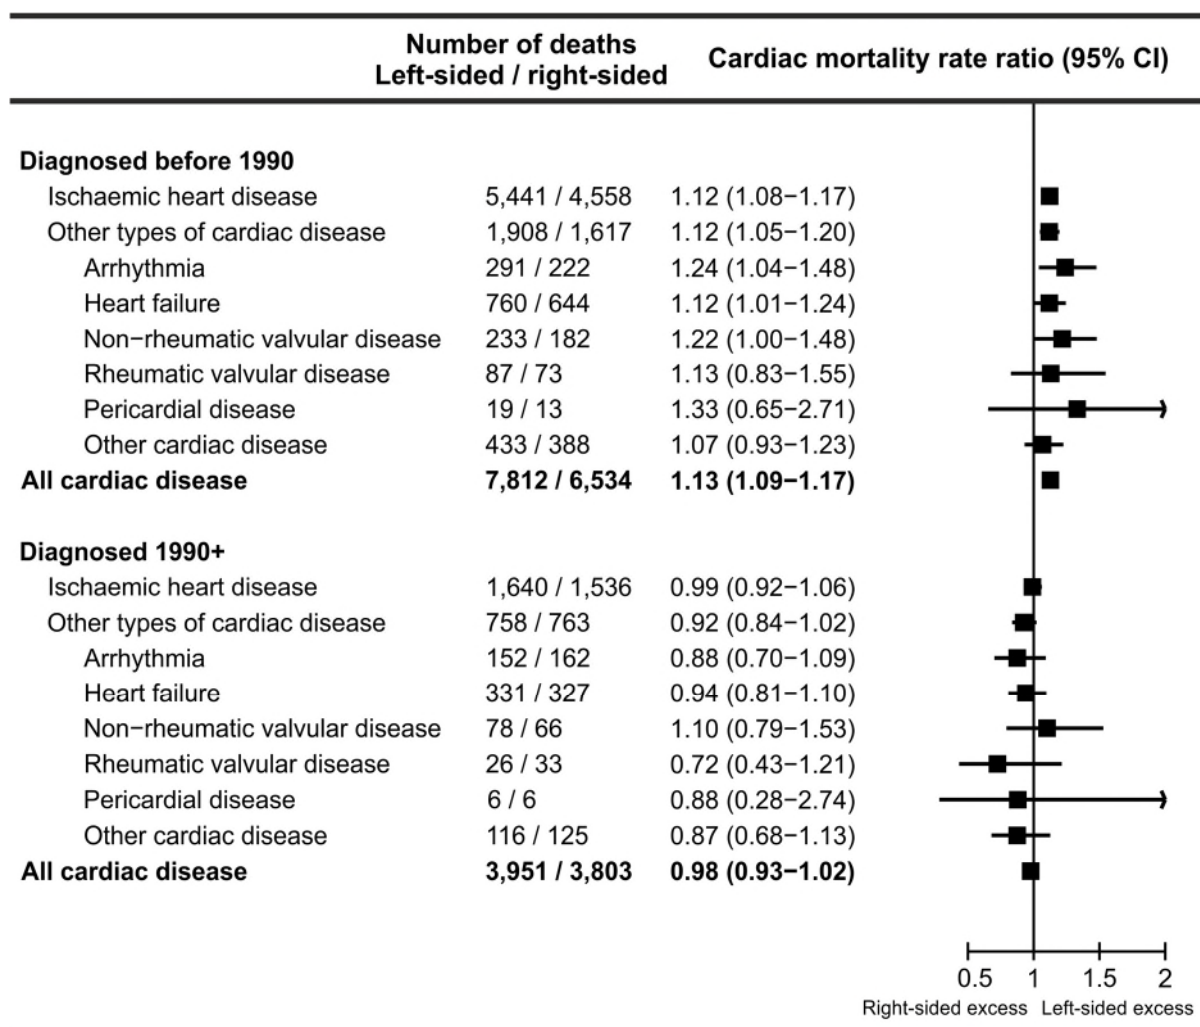

**Figure S6. Irradiated women with left-sided breast cancer versus irradiated women with right-sided breast cancer: Cardiac mortality rate ratios, by calendar year of breast cancer diagnosis and certified cause of death.**

See Table S2 for definitions of categories. Rate ratios estimated by Poisson regression with stratification by time since breast cancer diagnosis, age at breast cancer diagnosis, calendar year of breast cancer diagnosis, and country. Numbers of deaths from individual disease categories do not sum to totals as information on type of heart disease was unavailable from Surveillance, Epidemiology and End Results (SEER) for years 2000-2008, and was available only as two categories (ischaemic heart disease and other types of cardiac disease) from Ontario cancer registry.

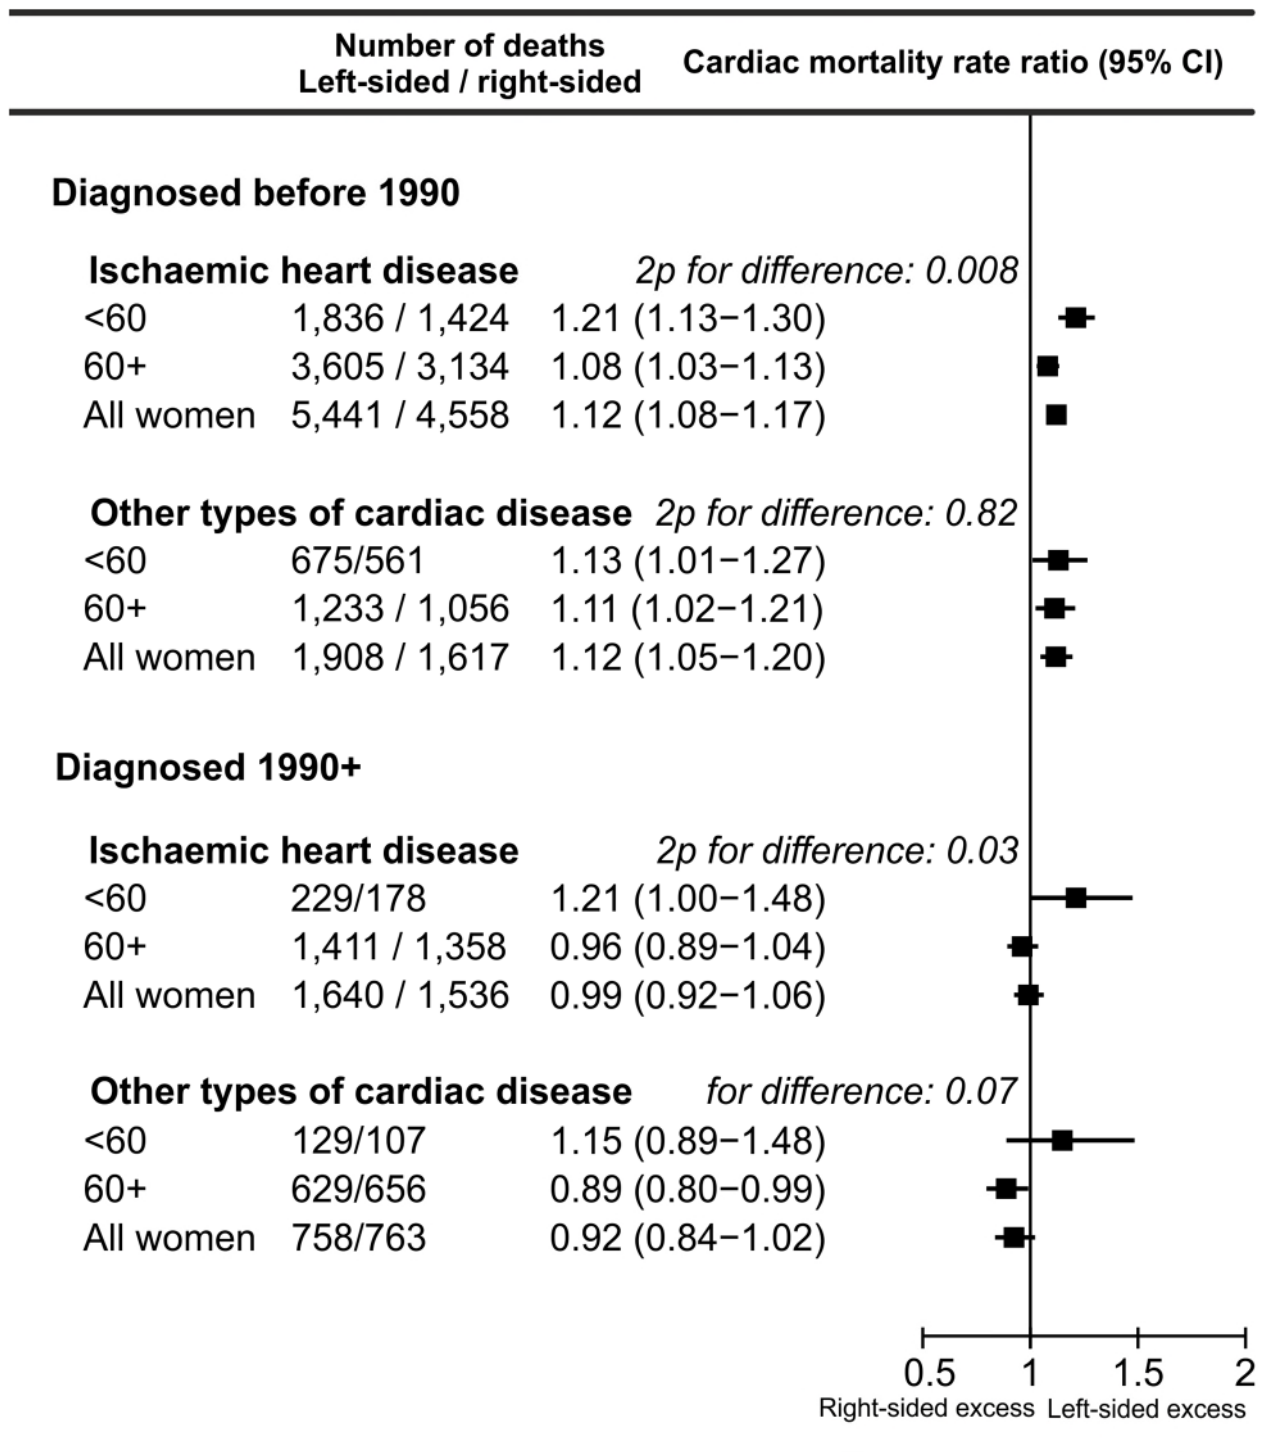

**Figure S7. Irradiated women with left-sided breast cancer versus irradiated women with right-sided breast cancer: Cardiac mortality rate ratios, by age at diagnosis and whether the women were diagnosed with ischaemic heart disease.**

Rate ratios estimated by Poisson regression with stratification by time since breast cancer diagnosis, age at breast cancer diagnosis, calendar year of breast cancer diagnosis, and country. Information on type of heart disease was unavailable from Surveillance, Epidemiology and End Results (SEER) for years 2000-2008.

**Table S6. Breast cancer radiotherapy: Studies reporting cardiac risk according to age irradiated\***

|               | Median age at RT (yr) | Design                             | Dosimetry   | No. cardiac events after RT |         | Results according to age                                                                                                                                                                                                       |                                                                                   |
|---------------|-----------------------|------------------------------------|-------------|-----------------------------|---------|--------------------------------------------------------------------------------------------------------------------------------------------------------------------------------------------------------------------------------|-----------------------------------------------------------------------------------|
|               |                       |                                    |             | All                         | Age <40 | Cardiac risk                                                                                                                                                                                                                   | Heart dose (Gy)                                                                   |
| Present study | 57                    | Cohort<br>Left vs right            | None        | 22,100<br>All time periods  | 340     | <b>Cardiac mortality RR L vs R &lt;1990</b><br>Age <40 1.46 (1.15-1.86)<br>Age 40-49 1.19 (1.07-1.31)<br>Age 50-59 1.20 (1.12-1.28)<br>Age 60-69 1.09 (1.03-1.15)<br>Age 70-79 1.08 (1.02-1.15)<br><i>p trend 0.003</i>        | NS                                                                                |
| Darby 2005    | NS                    | Cohort<br>Left vs right            | None        | 894                         | 231     | <b>Heart disease mortality ratio LvR</b><br>Age 20-49 1.54 (1.08-2.19)<br>Age 50-59 1.53 (1.19-2.16)<br>Age 60-69 1.40 (1.15-1.70)<br>Age 70-79 1.28 (0.87-1.90)<br><i>2p trend 0.40</i>                                       | NS                                                                                |
| McGale 2011   | NS                    | Cohort<br>Left vs right            | None        | 4291                        | 104     | <b>Heart disease incidence ratio LvR</b><br>Age <60 1.12 (1.01-1.24)<br>Age 60-79 1.06 (0.98-1.15)<br><i>p difference 0.4</i>                                                                                                  | NS                                                                                |
| Darby 2013    | 55                    | Case control                       | Individual  | 963                         | 20      | <b>Increase major coronary event rate per Gy</b><br>Age 20-39 -1.5 (<25.3-616)<br>Age 40-49 6.3 (-2.0-41.3)<br>Age 50-59 7.1 (0.4-22.2)<br>Age 60-69 7.8 (1.7-19.7)<br>Age 70-74 9.7 (-2.9-116)<br><i>p heterogeneity 0.99</i> | Age 20-39 4.7<br>Age 40-49 4.9<br>Age 50-59 5.1<br>Age 60-69 4.8<br>Age 70-74 4.9 |
| EBCTCG 2017   | 56                    | Meta-analysis<br>randomised trials | Trial-based | 1253                        | 14      | <b>Cardiac mortality RR RT vs not</b><br>Age <50 1.53 (1.07-2.19)<br>Age 50-59 1.27 (1.00-1.61)<br>Age 60+ 1.28 (1.10-1.48)<br><i>p trend 0.5</i>                                                                              | Age <50: 6.4<br>Age 50-59 6.2<br>Age 60+ 6.3                                      |
| Jacobse 2019  | 50                    | Case control                       | Individual  | 183                         | 9       | <b>Excess rate ratio per Gy</b><br>Age <45 24.2 (4.4-82.3)<br>Age 45-49 11.1(1.2-40.1)<br>Age 50-70 2.5 (-1.4-11.9)<br><i>p trend 0.07</i>                                                                                     | NS                                                                                |
| Paszat 1998   | ~60                   | Cohort<br>Left vs right            | None        | 703                         | NS      | <b>Myocardial infarction death RR LvR</b><br>Age <60 1.98 (1.31-2.97)<br>Age ≥60 1.17 (0.95-1.44)<br><i>P not specified</i>                                                                                                    | NS                                                                                |

\*Studies are ordered according to the number of cardiac events in women irradiated when aged <40 years  
Abbreviations; vs=versus; RR=rate ratio; RT=radiotherapy; NS=Not specified; yr=years;Gy=gray

## References for Table S6

Darby SC, McGale P, Taylor CW, Peto R. Long-term mortality from heart disease and lung cancer after radiotherapy for early breast cancer: prospective cohort study of about 300 000 women in US SEER cancer registries. *Lancet Oncol* 2005;6:557-565.

McGale P, Darby SC, Hall P, et al. Incidence of heart disease in 35,000 women treated with radiotherapy for breast cancer in Denmark and Sweden. *Radioth Oncol* 2011;100:167-175.

Darby SC, Ewertz M, McGale P, et al. Risk of ischemic heart disease in women irradiated for breast cancer. *New England Journal of Medicine* 2013;368:987-998.

Early Breast Cancer Trialists' Collaborative Group. Estimating the risks of breast cancer radiotherapy: Evidence from modern radiation doses to the lungs and heart and from previous randomised trials. *J Clin Oncol* 2017;35:1641-9.

Jacobse JN, Duane FK, Boekel NB, et al. Radiation dose-response for risk of myocardial infarction in breast cancer survivors. *Int J Radiat Oncol Biol Phys* 2019; 103: 595-604.

Paszat LF, Mackillop WJ, Groome PA, Boyd C, Schulze K, Holowaty E. Mortality from myocardial infarction after adjuvant radiotherapy for breast cancer in the Surveillance Epidemiology and End-Results Cancer Registries. *J Clin Oncol* 1998; 16: 2625-31.

**Table S7. Hodgkin lymphoma radiotherapy: Studies reporting cardiac risk according to age irradiated\***

|                   | Median age at RT (yr) | Design             | Dosimetry                               | No. cardiac events after RT |         | Results according to age                                                                                                                                                                                  |                                                                                                                                 |
|-------------------|-----------------------|--------------------|-----------------------------------------|-----------------------------|---------|-----------------------------------------------------------------------------------------------------------------------------------------------------------------------------------------------------------|---------------------------------------------------------------------------------------------------------------------------------|
|                   |                       |                    |                                         | All                         | Age <40 | Cardiac risk                                                                                                                                                                                              | Heart dose (Gy)                                                                                                                 |
| Van Nimwegen 2016 | 32                    | Case control study | Individual                              | 325                         | 251     | <b>Excess relative risk incident coronary heart disease per Gy</b><br>Age <27.5 20% (5.4-70.5)<br>Age 27.5-36.4 8.8% (2.6-22.9)<br>Age 36.5-50.9 4.2% (0.6-11.1)<br><i>p interaction 0.15</i>             | NS                                                                                                                              |
| Hancock 1993      | 29                    | Cohort             | Individual mediastinal dose (not heart) | 49                          | 28      | <b>Myocardial infarction death RR</b><br>Age <20 44.1 (17.8-91.0)<br>Age 20-29 7.3 (3.4-13.8)<br>Age 30-39 5.1 (2.9-7.4)<br>Age 40-49 3.0 (1.4-5.5)<br>Age ≥50 1.8 (1.0-3.0)<br><i>p trend &lt;0.0001</i> | <b>Mediastinal dose</b><br>Age <10 21.5<br>Age 10-19 37.3<br>Age 20-29 40.5<br>Age 30-39 38.8<br>Age 40-49 36.7<br>Age ≥50 28.7 |
| Boivin 1992       | NS                    | Case control       | None                                    | 124                         | 23      | <b>Relative risk of acute myocardial infarction death</b><br>Age 0-39 1.95 (0.25-15.35)<br>Age 40-59 1.44 (0.49-4.25)<br>Age 60+ 3.78 (1.12-12.80)<br><i>P heterogeneity 0.64</i>                         | NS                                                                                                                              |

\*Studies are ordered according to the number of cardiac events in women irradiated when aged <40 years  
Abbreviations; RR=rate ratio; RT=radiotherapy; NS=Not specified; yr: years; Gy: gray

**References for Table S7**

Van Nimwegen FA, Schaapveld M, Cutter DJ, et al. Radiation dose-response relationship for risk of coronary heart disease in survivors of Hodgkin lymphoma. J Clin Oncol 2016; 34: 235-43.

Hancock SL, Donaldson SS, Hoppe RT. Cardiac disease following treatment of Hodgkin’s disease in children and adolescents. J Clin Oncol 1993; 11: 1208-15.

Boivin J-F, Hutchison GB, Lubin JH, Mauch P. Coronary artery disease mortality in patients treatment for Hodgkins disease. Cancer 1992; 69: 1241-7.
